# Supplementary material for: Metagenomic analysis of the abundance and composition of antibiotic resistance genes in hospital wastewater in Benin, Burkina Faso, and Finland
Source: bioRxiv or medRxiv preprint supplement (doi:10.1101/2021.10.19.21265183), 2022-10-27
Supplement: Supplementary file [file media-1.pdf]

1 Supplementary Material

2

3 Metagenomic analysis of antimicrobial resistance genes in wastewaters in Benin and Burkina Faso indicates a  
4 serious health risk from untreated hospital wastewaters in low-income countries

5

6 Melina A. Markkanen<sup>1\*</sup>, Kaisa Haukka<sup>1,6</sup>, Katariina M. M. Pärnänen<sup>1</sup>, Victorien Tamegnon Dougnon<sup>2</sup>, Isidore  
7 Juste O. Bonkougou<sup>3</sup>, Zakaria Garba<sup>4</sup>, Halidou Tinto<sup>4</sup>, Anniina Sarekoski<sup>1</sup>, Antti Karkman<sup>1</sup>, Anu Kantele<sup>5,6†</sup>,  
8 Marko P. J. Virta<sup>1\*†</sup>

9

10 <sup>1</sup>Department of Microbiology, University of Helsinki, Finland

11 <sup>2</sup>Research Unit in Applied Microbiology and Pharmacology of Natural Substances, Polytechnic School of  
12 Abomey-Calavi, University of Abomey-Calavi, Benin

13 <sup>3</sup>Department of Biochemistry and Microbiology, University Joseph KI-ZERBO, Ouagadougou, Burkina Faso

14 <sup>4</sup>Clinical Research Unit Nanoro, Institute for Research in Health Sciences, National Center for Scientific and  
15 Technological Research, Burkina Faso

16 <sup>5</sup>Meilahti Infectious Diseases and Vaccine Research Center, MeiVac, Department of Infectious Diseases,  
17 University of Helsinki and Helsinki University Hospital, Helsinki, Finland

18 <sup>6</sup>Human Microbiome Research Program, Faculty of Medicine, University of Helsinki, Helsinki, Finland

19

20 *Author information*

21 Corresponding authors:

22 Marko P. J. Virta

23 Melina A. Markkanen

24

25 † Equal contribution

26

27 Figure S1. Sample collection in Benin and Burkina Faso.

28 Figure S2. Examples of sampling sites.

29 Figure S3. PCoA plots describing the ordinations based on resistomes, taxonomical compositions, and mobilomes.

30 Table S1. Significance levels for ordination plots.

31 Figure S4. Unique and shared ARGs between hospital wastewaters in Benin, Burkina Faso, and Finland.

32 Figure S5. Comparative analysis of contigs that harbor plasmid-mediated *mcr-5.1* colistin resistance gene in four  
33 different metagenomic samples

34 Table S2: Relative abundances of plasmid-mediated colistin ARGs in Benin and Burkina Faso.

35

36 Pages: 7

37 Tables: 2

38 Figures: 5

39

40

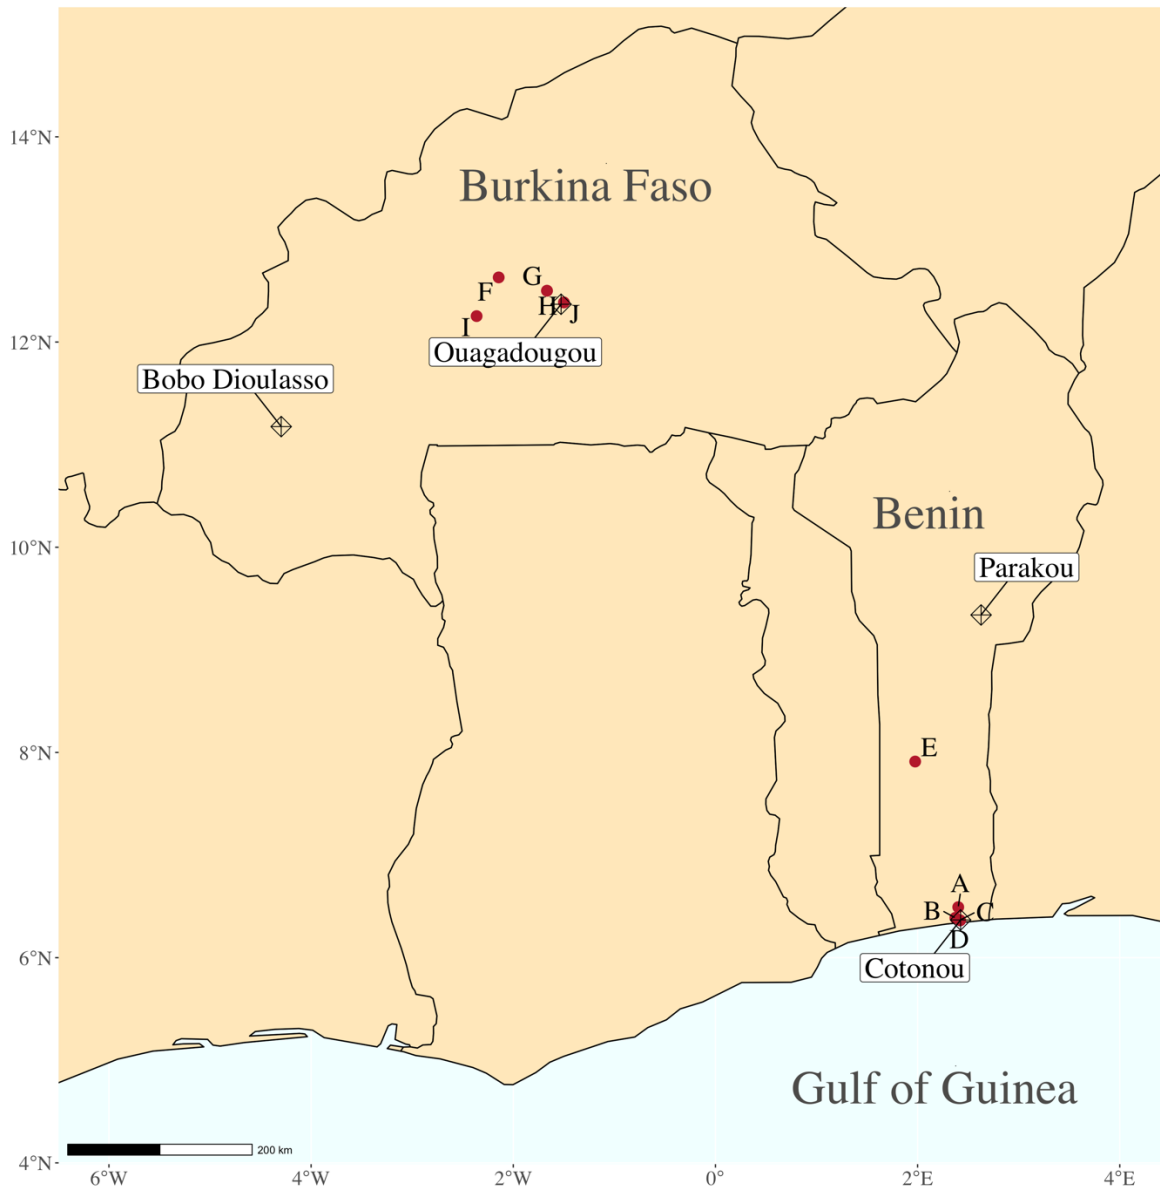

41

42 **Figure S1: Sample collection in Benin and Burkina Faso.** Sample collection sites are denoted with red dots on  
 43 the map. The climate in the coastal region of Benin is hot and humid. The average daytime temperature in Cotonou  
 44 varies between 28–32 °C and humidity between 77–84 %, with an annual rainfall of 1,308 mm. Burkina Faso is  
 45 characterized by a dry tropical climate. The average daytime temperature in Ouagadougou varies between 31–  
 46 39 °C, and the annual rainfall is 745 mm. During the sampling period in November/December, it typically rains  
 47 only a little in Cotonou and not at all in Ouagadougou.

48

49

50

51

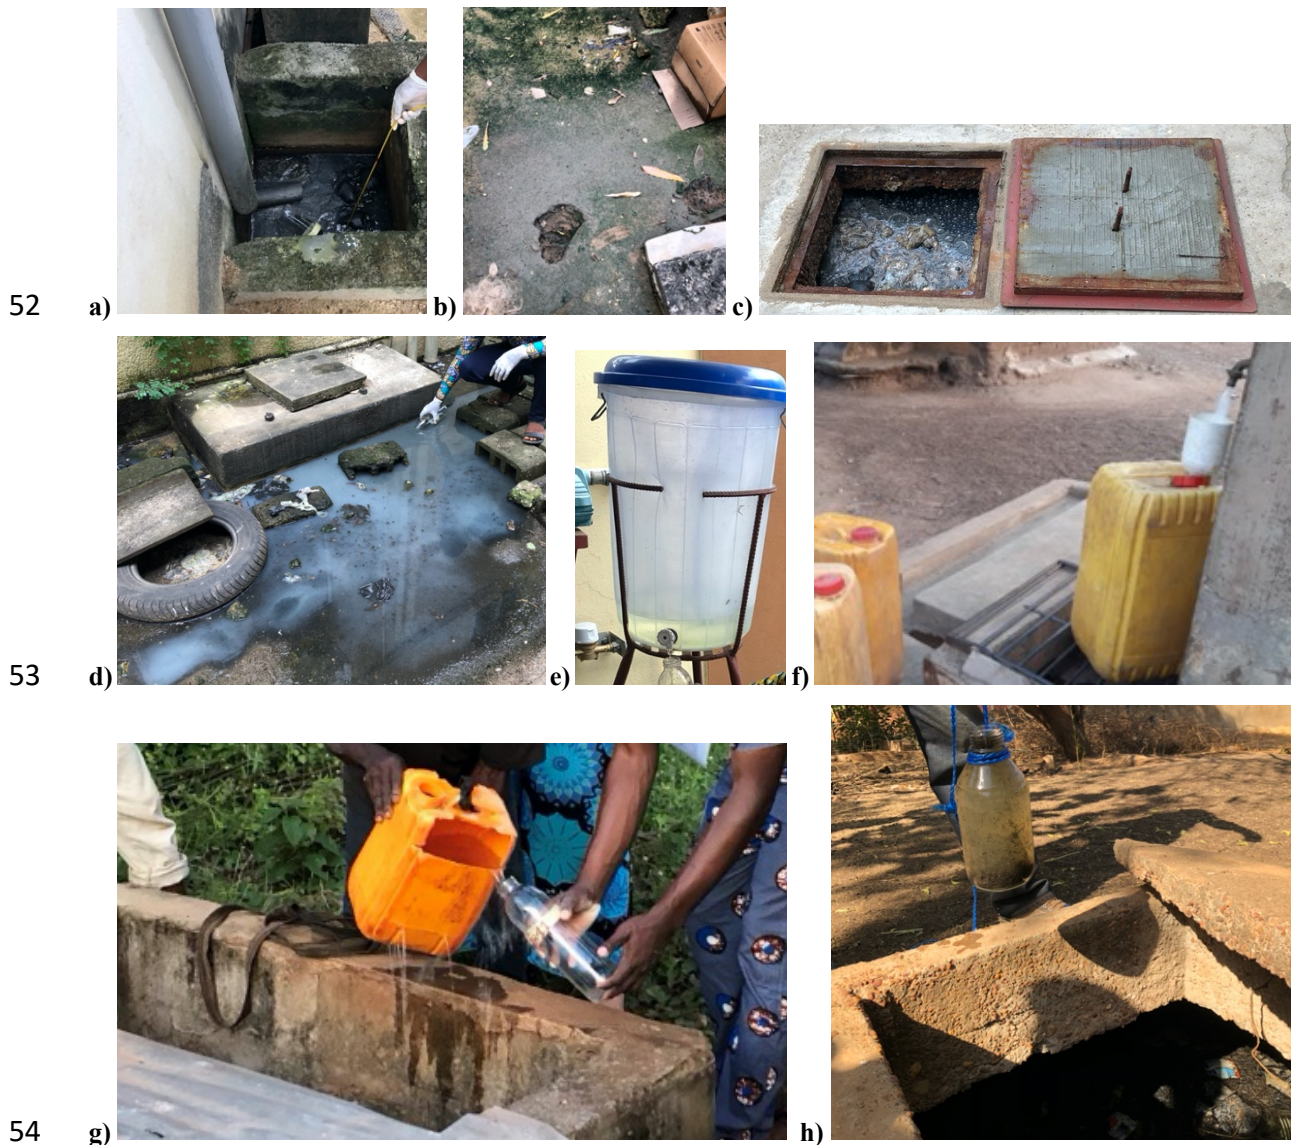

52

53

54

55

56 **Figure S2: Examples of sampling sites.** The samples collected in Benin included **a)** HWW from an open cesspit  
 57 next to the wall at the hospital B (sample BH29); **b)** moist soil between two septic tanks (samples BH31 and  
 58 BH34) at hospital B; **c)** the central septic tank collecting wastewater from different sections of hospital C (sample  
 59 BH44); **d)** water pool surrounding the surgery room septic tank at hospital C (sample BH48); **e)** water from a tank  
 60 used for washing hands at hospital C (sample BH52); **f)** tap water in a distant village in Benin (sample BSE93);  
 61 and **g)** well water 100 m away from hospital A in Benin (sample BH11). **h)** In Burkina Faso, the HWW septic  
 62 tank is shown for hospital F (sample BFH1). Photos by K. Haukka, A. Sarekoski and A. Butcher.

63

64

65

66

67

68

69

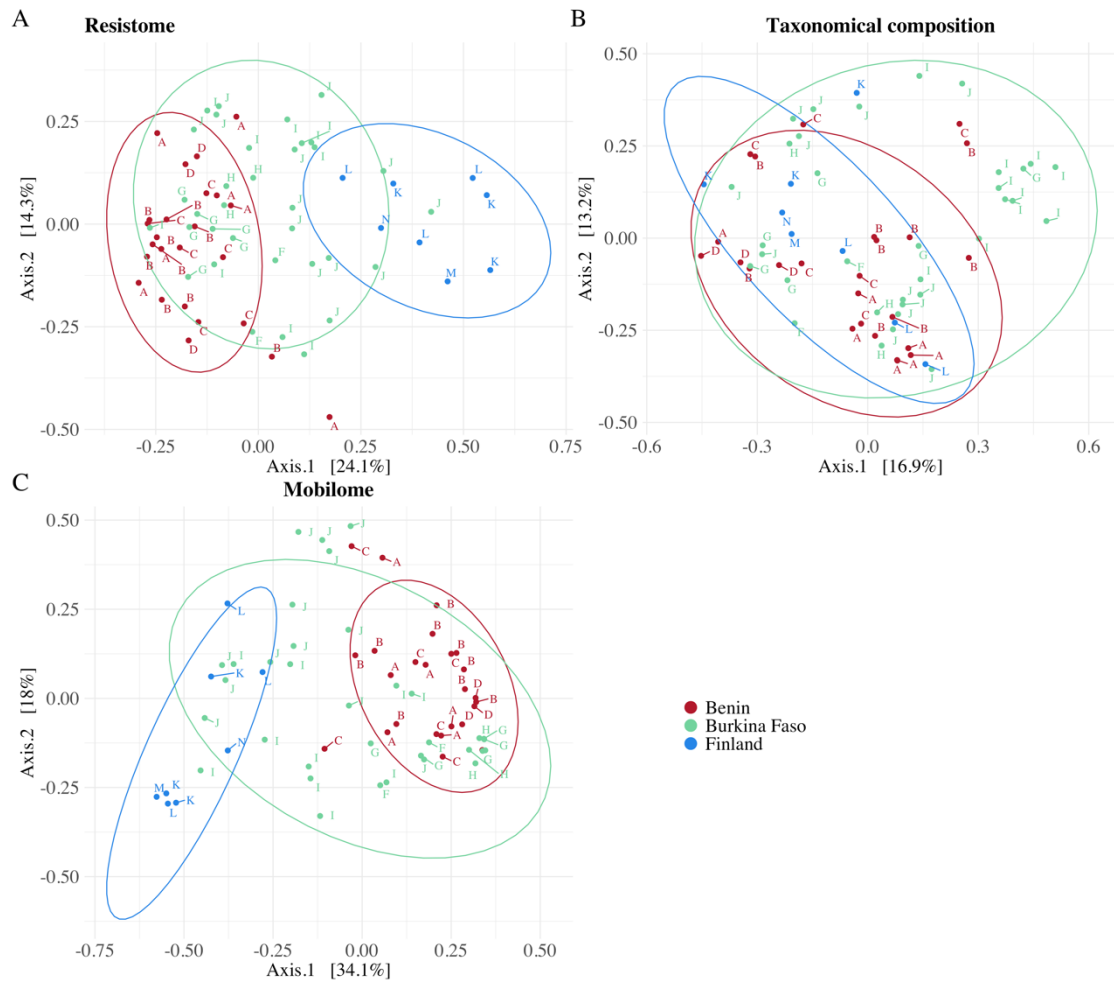

70  
 71  
 72

73 **Figure S3: PCoA plots describing the ordinations based on a) resistomes, b) taxonomical compositions, and**  
 74 **c) mobilomes present in HWWs from Benin, Burkina Faso, and Finland.** Countries are coded as colors, and  
 75 the specific hospitals are marked with a corresponding capitalized letter. Confidence ellipses represent 90 %  
 76 confidence levels.

77

78 **Table S1: Significance levels for ordination plots.** The significance was measured using equal size sample  
 79 groups (n=8/country) of randomly selected samples. The triplicated tests were mainly in line with each other,  
 80 suggesting that sample selection did not significantly affect the results. The significance levels are denoted as  
 81 follows: ‘\*\*\*\*’ ≤ 0.001; ‘\*\*\*’ = 0.001-0.01; ‘\*\*’ = 0.01-0.05; ‘.’ = 0.05-0.1; ‘ ’ = 0.1-1.

| ARGs, Horn           |               |       |     |               |       |     |               |       |     |
|----------------------|---------------|-------|-----|---------------|-------|-----|---------------|-------|-----|
|                      | sample set #1 |       |     | sample set #2 |       |     | sample set #3 |       |     |
| Benin-Finland        | 0.29492       | 0.001 | *** | 0.30982       | 0.002 | **  | 0.33668       | 0.001 | *** |
| Benin-Burkina Faso   | 0.09321       | 0.121 |     | 0.17575       | 0.002 | **  | 0.16236       | 0.007 | **  |
| Burkina Faso-Finland | 0.24544       | 0.001 | *** | 0.25117       | 0.001 | *** | 0.25585       | 0.001 | *** |

  

| Taxonomical composition, Horn |               |       |     |               |       |     |               |       |    |
|-------------------------------|---------------|-------|-----|---------------|-------|-----|---------------|-------|----|
|                               | sample set #1 |       |     | sample set #2 |       |     | sample set #3 |       |    |
| Benin-Finland                 | 0.17282       | 0.002 | **  | 0.20603       | 0.001 | *** | 0.18496       | 0.002 | ** |
| Benin-Burkina Faso            | 0.08476       | 0.159 |     | 0.14289       | 0.007 | **  | 0.08541       | 0.175 |    |
| Burkina Faso-Finland          | 0.16481       | 0.001 | *** | 0.14788       | 0.006 | **  | 0.16983       | 0.002 | ** |

  

| MGEs Horn            |               |       |     |               |       |     |               |       |     |
|----------------------|---------------|-------|-----|---------------|-------|-----|---------------|-------|-----|
|                      | sample set #1 |       |     | sample set #2 |       |     | sample set #3 |       |     |
| Benin-Finland        | 0.31312       | 0.002 | **  | 0.34187       | 0.001 | *** | 0.34196       | 0.001 | *** |
| Benin-Burkina Faso   | 0.06114       | 0.497 |     | 0.10201       | 0.098 | .   | 0.0994        | 0.094 | .   |
| Burkina Faso-Finland | 0.20934       | 0.001 | *** | 0.22952       | 0.001 | *** | 0.20678       | 0.002 | **  |

82  
83  
84

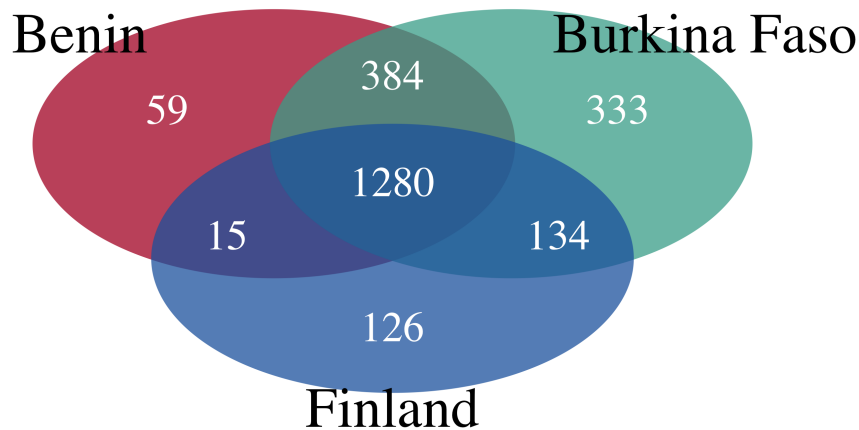

85  
86  
87  
88  
89  
90  
91

**Figure S4: Unique and shared ARGs between hospital wastewaters in Benin, Burkina Faso, and Finland.**  
A total of 2,331 ARGs were detected among 67 hospital wastewater samples in the three countries. The number of unique ARGs was substantially higher (333) in Burkina Faso compared to Benin (59) or Finland (126)

92  
93

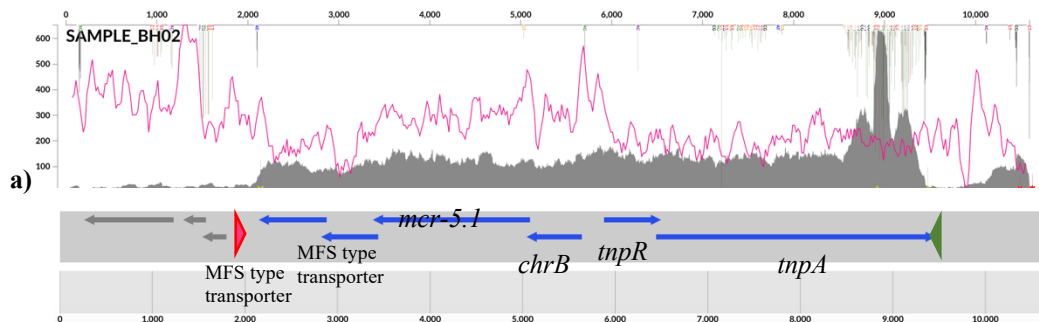

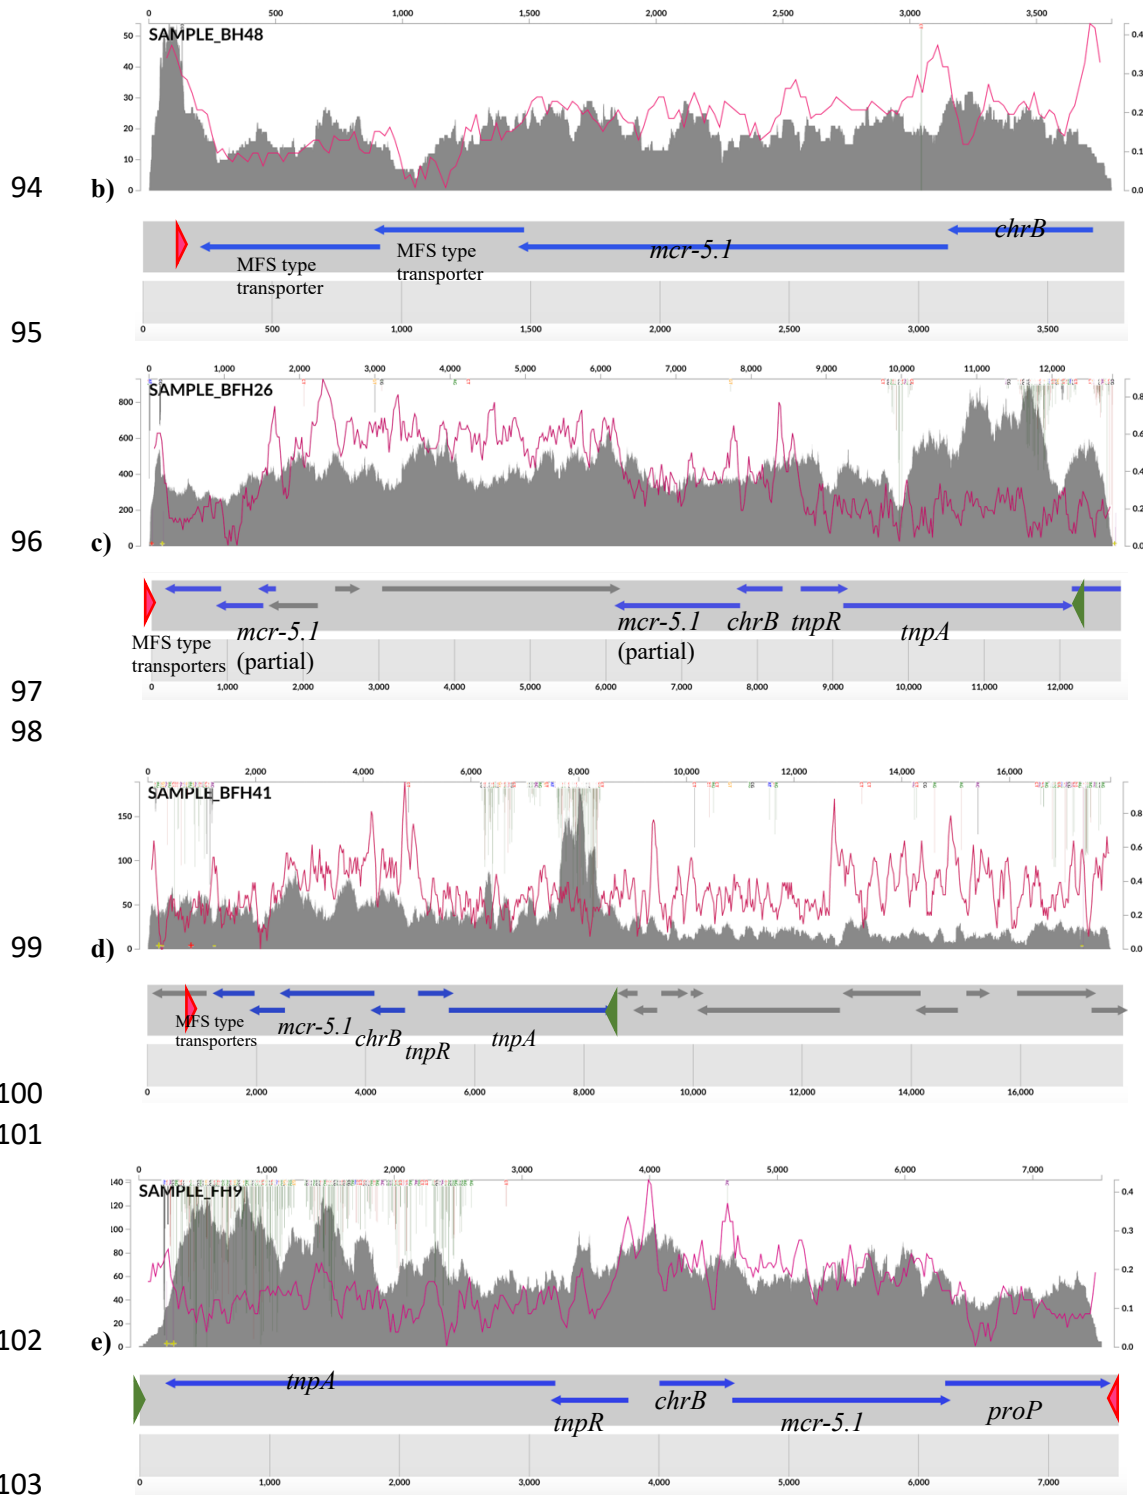

94

95

96

97

98

99

100

101

102

103

104

105

106

107

108

109

110

111

**Figure S5: Comparative analysis of contigs that harbor plasmid-mediated *mcr-5.1* colistin resistance gene in four different metagenomic samples.** Visualizations of the contigs were created using anvio (v7) metagenomics workflow for single profiles<sup>1</sup>. Putative encoding genes are indicated by blue arrows. The gene names were determined based on BLAST search results. The recruited reads are shown as a dark grey histogram with an overlay line (pink) denoting the GC content. Single nucleotide variation is shown on top of the panel with colourful vertical lines. Inverse repeat sequences of Tn3-like transposase sequences (38 bp) are shown with dark pink (IRL: 5' GGGGTCGTCTCAGAAAACGGAAAAAATCGTACGCTAAG 3') and green triangles (IRR: 5'

112 CTTAGCGTACGATTTTTTCCGTTTTCTAGACGACCCC 3'<sup>2</sup>). The genetic environments are shown for  
 113 samples a) BH02 b) BH48, c) BFH26 d) BFH41, and e) FH9.

114

115 **Table S2: Relative abundances of plasmid-mediated colistin ARGs in a) Benin and b) Burkina Faso.**

| Gene variant    | Relative abundance |                        |                        |                        |                        |                        |                        |                        |                                    |                        |                                    |                        |                            |                        |                                                  |                        |
|-----------------|--------------------|------------------------|------------------------|------------------------|------------------------|------------------------|------------------------|------------------------|------------------------------------|------------------------|------------------------------------|------------------------|----------------------------|------------------------|--------------------------------------------------|------------------------|
|                 | Benin              |                        |                        |                        |                        | Burkina Faso           |                        |                        |                                    |                        |                                    |                        |                            |                        |                                                  |                        |
| Gene variant    | Feces samples      |                        | River water, drinking  |                        | Well water, drinking   |                        | Tap water              |                        | Street gutter, 100 m from hospital |                        | Mold soil between HWW septic tanks |                        | Water used for handwashing |                        | Water middle surrounding the surgery room septic |                        |
|                 | BH20, Hosp. B      | BH22, Hosp. B          | BH24, Hosp. B          | BH25, Hosp. B          | BHE100                 | BSE74                  | BSE79                  | BH11, Hosp. A          | BSE93                              | BH13 (water), Hosp. B  | BH14 (sediment), Hosp. B           | BH22, Hosp. B          | BH52, Hosp. C              | BH48, Hosp. C          |                                                  |                        |
| <i>mcr-1</i>    | 0                  | 0                      | 0                      | 0                      | 0                      | 0                      | 0                      | 0                      | 0                                  | 0                      | 0                                  | 0                      | 0                          | 0                      | 0                                                | 0                      |
| <i>mcr-3</i>    | 0                  | 1.52 x 10 <sup>3</sup> | 0                      | 4.74 x 10 <sup>5</sup> | 0                      | 0                      | 0                      | 2.43 x 10 <sup>5</sup> | 0                                  | 0                      | 0                                  | 6.79 x 10 <sup>5</sup> | 1.77 x 10 <sup>3</sup>     | 1.96 x 10 <sup>2</sup> | 0                                                | 0                      |
| <i>mcr-3.17</i> | 0                  | 0                      | 2.25 x 10 <sup>5</sup> | 0                      | 3.22 x 10 <sup>5</sup> | 0                      | 0                      | 0                      | 0                                  | 0                      | 0                                  | 0                      | 0                          | 4.23 x 10 <sup>4</sup> | 0                                                | 0                      |
| <i>mcr-4</i>    | 0                  | 0                      | 0                      | 0                      | 0                      | 0                      | 0                      | 0                      | 0                                  | 0                      | 0                                  | 0                      | 0                          | 0                      | 0                                                | 0                      |
| <i>mcr-5</i>    | 0                  | 0                      | 2.22 x 10 <sup>5</sup> | 4.68 x 10 <sup>5</sup> | 0                      | 1.10 x 10 <sup>4</sup> | 4.19 x 10 <sup>5</sup> | 0                      | 0                                  | 5.48 x 10 <sup>5</sup> | 0                                  | 8.9 x 10 <sup>5</sup>  | 7.76 x 10 <sup>5</sup>     | 1.99 x 10 <sup>3</sup> | 0                                                | 0                      |
| <i>mcr-7</i>    | 0                  | 0                      | 0                      | 0                      | 0                      | 3.73 x 10 <sup>5</sup> | 0                      | 9.73 x 10 <sup>5</sup> | 2.25 x 10 <sup>3</sup>             | 0                      | 2.27 x 10 <sup>5</sup>             | 3.94 x 10 <sup>5</sup> | 7.07 x 10 <sup>5</sup>     | 0                      | 0                                                | 0                      |
| <i>mcr-8</i>    | 0                  | 0                      | 0                      | 0                      | 0                      | 0                      | 0                      | 0                      | 0                                  | 0                      | 0                                  | 0                      | 0                          | 0                      | 0                                                | 0                      |
| <i>mcr-9</i>    | 0                  | 0                      | 0                      | 0                      | 3.23 x 10 <sup>5</sup> | 0                      | 0                      | 0                      | 0                                  | 0                      | 0                                  | 0                      | 0                          | 0                      | 0                                                | 0                      |
| <i>mcr-10</i>   | 0                  | 6.12 x 10 <sup>3</sup> | 0                      | 0                      | 0                      | 0                      | 4.25 x 10 <sup>5</sup> | 4.87 x 10 <sup>3</sup> | 0                                  | 0                      | 0                                  | 0                      | 3.94 x 10 <sup>5</sup>     | 0                      | 0                                                | 1.77 x 10 <sup>3</sup> |

  

| Gene variant    | Burkina Faso                                     |                                                   |                                               |                                                 |
|-----------------|--------------------------------------------------|---------------------------------------------------|-----------------------------------------------|-------------------------------------------------|
|                 | Municipality channel, after biological treatment | Wetland receiving treated wastewater (from BFH26) | Connection point between HWW and WWTP channel | River receiving treated wastewater (from BFH41) |
| Gene variant    | BFH26, Hosp. I                                   | BFH27, Hosp. I                                    | BFH41, Hosp. J                                | BFH42, Hosp. J                                  |
| <i>mcr-1</i>    | 0                                                | 0                                                 | 0                                             | 0                                               |
| <i>mcr-3</i>    | 4.19 x 10 <sup>5</sup>                           | 8.70 x 10 <sup>5</sup>                            | 1.80 x 10 <sup>4</sup>                        | 2.65 x 10 <sup>5</sup>                          |
| <i>mcr-3.17</i> | 0                                                | 0                                                 | 0                                             | 0                                               |
| <i>mcr-4</i>    | 0                                                | 0                                                 | 0                                             | 0                                               |
| <i>mcr-5</i>    | 2.8 x 10 <sup>2</sup>                            | 4.30 x 10 <sup>4</sup>                            | 3.20 x 10 <sup>3</sup>                        | 2.36 x 10 <sup>4</sup>                          |
| <i>mcr-7</i>    | 8.40 x 10 <sup>5</sup>                           | 0                                                 | 7.59 x 10 <sup>5</sup>                        | 0                                               |
| <i>mcr-8</i>    | 0                                                | 0                                                 | 0                                             | 0                                               |
| <i>mcr-9</i>    | 0                                                | 0                                                 | 9.49 x 10 <sup>6</sup>                        | 0                                               |
| <i>mcr-10</i>   | 0                                                | 1.74 x 10 <sup>4</sup>                            | 6.64 x 10 <sup>5</sup>                        | 7.97 x 10 <sup>5</sup>                          |

116

117 *References*

118

- 119 1. Murat Eren, A. *et al.* Community-led, integrated, reproducible multi-omics with anvi'o. *Nat. Microbiol.*  
120 **6**, 3–6 (2021).
- 121 2. Borowiak, M. *et al.* Identification of a novel transposon-associated phosphoethanolamine transferase  
122 gene, *mcr-5*, conferring colistin resistance in d-tartrate fermenting *Salmonella enterica* subsp. *enterica*  
123 serovar Paratyphi B. *J. Antimicrob. Chemother.* **72**, 3317–3324 (2017).
- 124
