# Supplementary material for: Metagenomic analysis of the abundance and composition of antibiotic resistance genes in hospital wastewater in Benin, Burkina Faso, and Finland
Source: bioRxiv or medRxiv preprint supplement (doi:10.1101/2021.10.19.21265183), 2022-10-27
Supplement: Supplementary file [file media-1.pdf]

## Supporting Information 1

Metagenomic analysis of antimicrobial resistance genes in wastewaters in Benin and Burkina Faso indicates a serious health risk from untreated hospital wastewaters in low-income countries

Melina A. Markkanen<sup>a,b</sup> #, Kaisa Haukka<sup>a, g</sup>, Katariina M. M. Pärnänen<sup>a</sup>, Victorien Tamegnon Dougnon<sup>c</sup>, Isidore Juste O. Bonkougou<sup>d</sup>, Zakaria Garba<sup>e</sup>, Halidou Tinto<sup>e</sup>, Anniina Sarekoski<sup>a</sup>, Antti Karkman<sup>a, b</sup>, Anu Kantele<sup>b, f, g</sup> \*, Marko P. J. Virta<sup>a, b</sup> #\*

<sup>a</sup> Department of Microbiology, University of Helsinki, Finland

<sup>b</sup> Multidisciplinary Center of Excellence in Antimicrobial Resistance Research, Finland

<sup>c</sup> Research Unit in Applied Microbiology and Pharmacology of Natural Substances, Polytechnic School of Abomey-Calavi, University of Abomey-Calavi, Benin

<sup>d</sup> Department of Biochemistry and Microbiology, University Joseph KI-ZERBO, Ouagadougou, Burkina Faso

<sup>e</sup> Clinical Research Unit Nanoro, Institute for Research in Health Sciences, National Center for Scientific and Technological Research, Burkina Faso

<sup>f</sup> Meilahti Infectious Diseases and Vaccine Research Center, MeiVac, Department of Infectious Diseases, University of Helsinki and Helsinki University Hospital, Helsinki, Finland

<sup>g</sup> Human Microbiome Research Program, Faculty of Medicine, University of Helsinki, Helsinki, Finland

Corresponding authors:

# Marko P. J. Virta, [marko.virta@helsinki.fi](mailto:marko.virta@helsinki.fi)

# Melina A. Markkanen, [melina.markkanen@helsinki.fi](mailto:melina.markkanen@helsinki.fi)

\* Marko P. J. Virta and Anu Kantele contributed equally to this work.

Table of Contents:

|                                                                                                        |   |
|--------------------------------------------------------------------------------------------------------|---|
| Figure S1. Sample collection in Benin and Burkina Faso.....                                            | 2 |
| Figure S2. Examples of sampling sites.....                                                             | 2 |
| Figure S3. PCoA plots for resistomes, taxonomical compositions, and mobilomes.....                     | 4 |
| Table S1. Significance levels for ordination plots.....                                                | 5 |
| Figure S4. Unique and shared ARGs between hospital wastewaters in Benin, Burkina Faso, and Finland.... | 5 |
| Figure S5. Relative abundance of clinically relevant species.....                                      | 6 |
| Figure S6. Multidrug-resistance fragments putatively encoded by class 1 integron gene cassettes.....   | 6 |
| Figure S7. Contigs harboring mobile colistin resistance gene <i>mcr-5.1</i> .....                      | 7 |
| References .....                                                                                       | 8 |

Pages: 9

Figures: 7

Tables: 1

41  
42

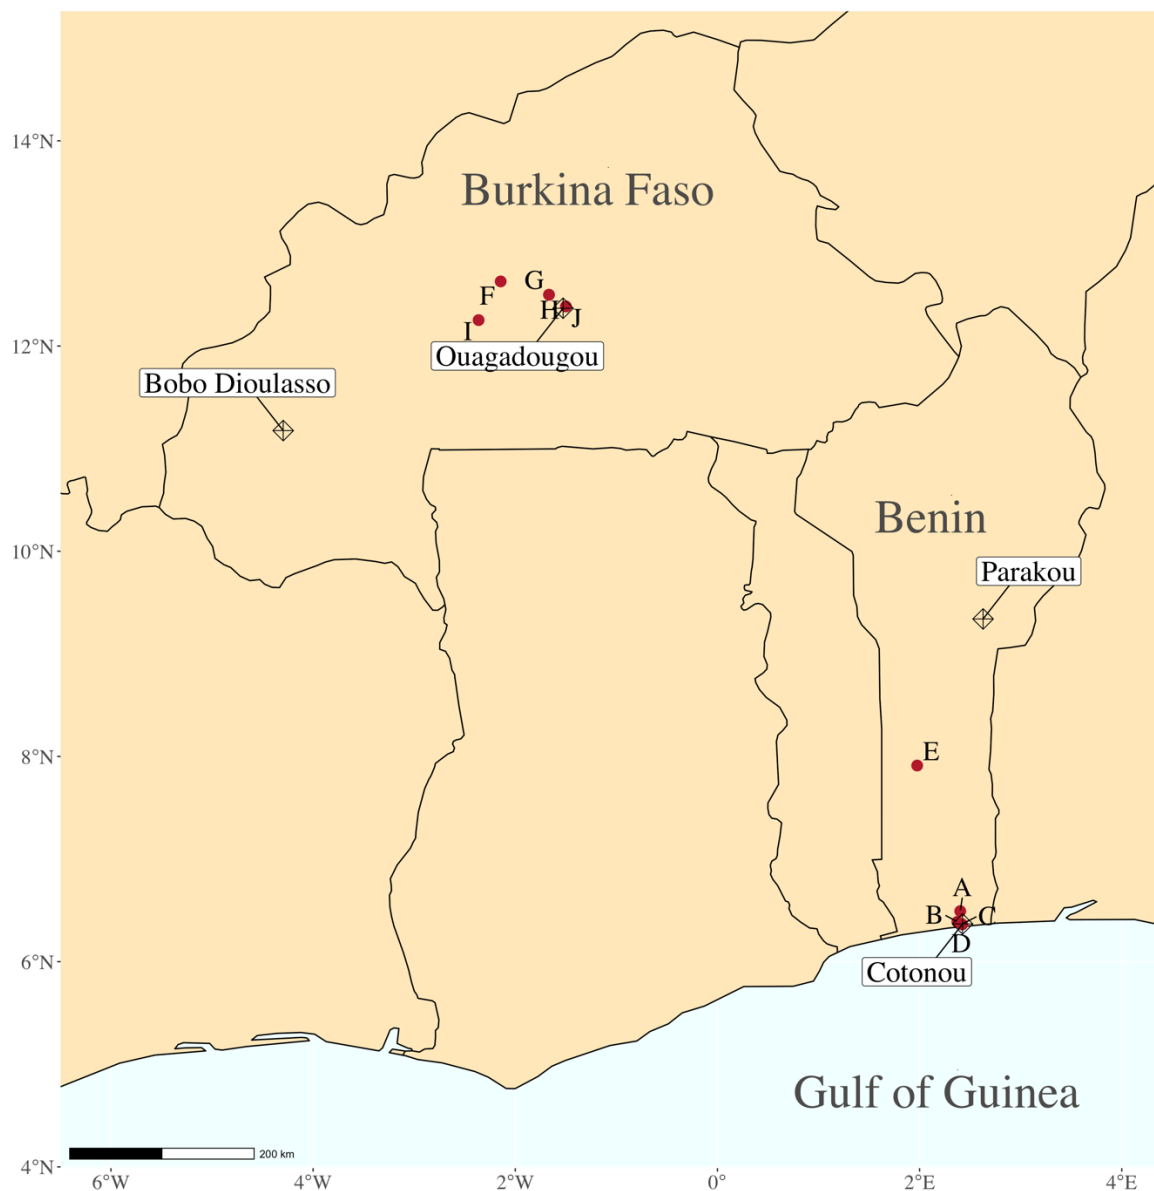

43  
44  
45  
46  
47  
48  
49  
50

**Figure S1.** Sample collection in Benin and Burkina Faso. Sample collection sites are denoted with red dots on the map. The climate in the coastal region of Benin is hot and humid. The average daytime temperature in Cotonou varies between 28–32 °C and humidity between 77–84 %, with an annual rainfall of 1,308 mm. Burkina Faso is characterized by a dry tropical climate. The average daytime temperature in Ouagadougou varies between 31–39 °C, and the annual rainfall is 745 mm. During the sampling period in November/December, it typically rains only a little in Cotonou and not at all in Ouagadougou.

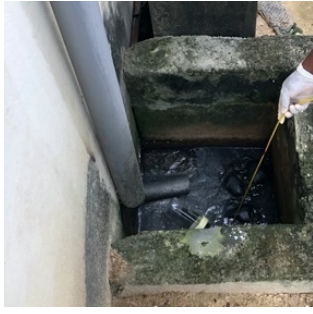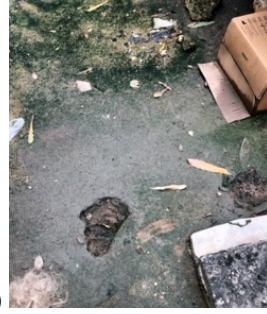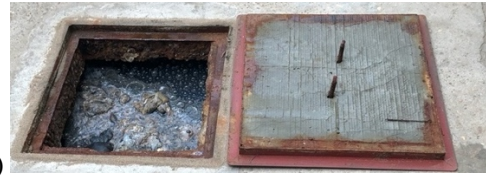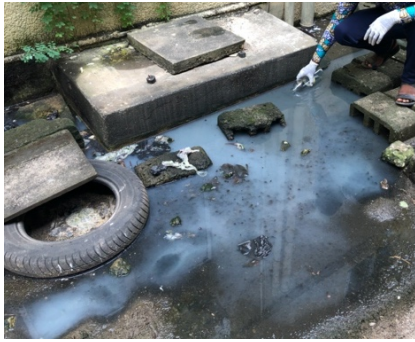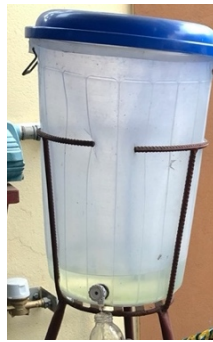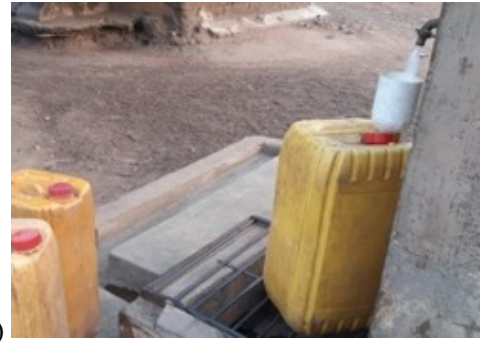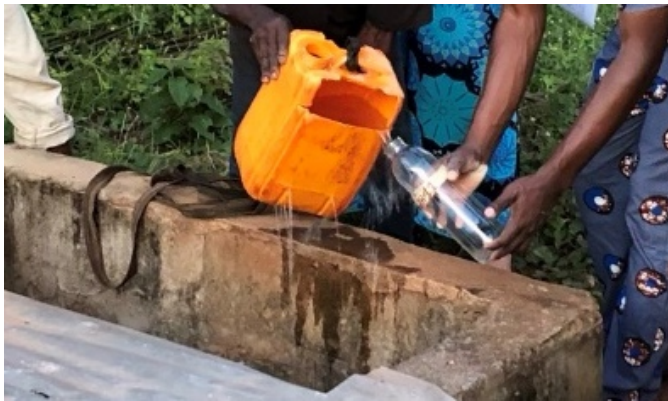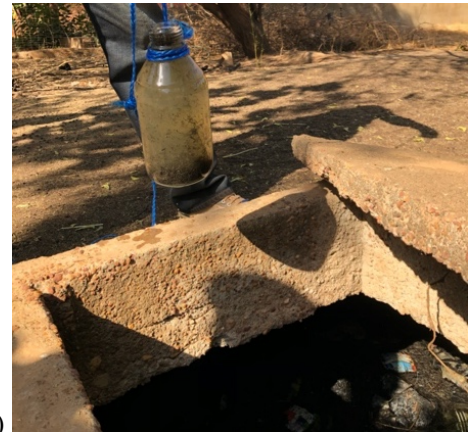

**Figure S2.** Examples of sampling sites. The samples collected in Benin included A) HWW from an open cesspit next to the wall at the hospital B (sample BH29); B) moist soil between two septic tanks (samples BH31 and BH34) at hospital B; C) the central septic tank collecting wastewater from different sections of hospital C (sample BH44); D) water puddle surrounding the surgery room septic tank at hospital C (sample BH48); E) water from a tank used for washing hands at hospital C (sample BH52); F) tap water in a distant village in Benin (sample BSE93); and G) well water 100 m away from hospital A in Benin (sample BH11). H) In Burkina Faso, the HWW septic tank is shown for hospital F (sample BFH1). Photos by K. Haukka, A. Sarekoski and A. Butcher.

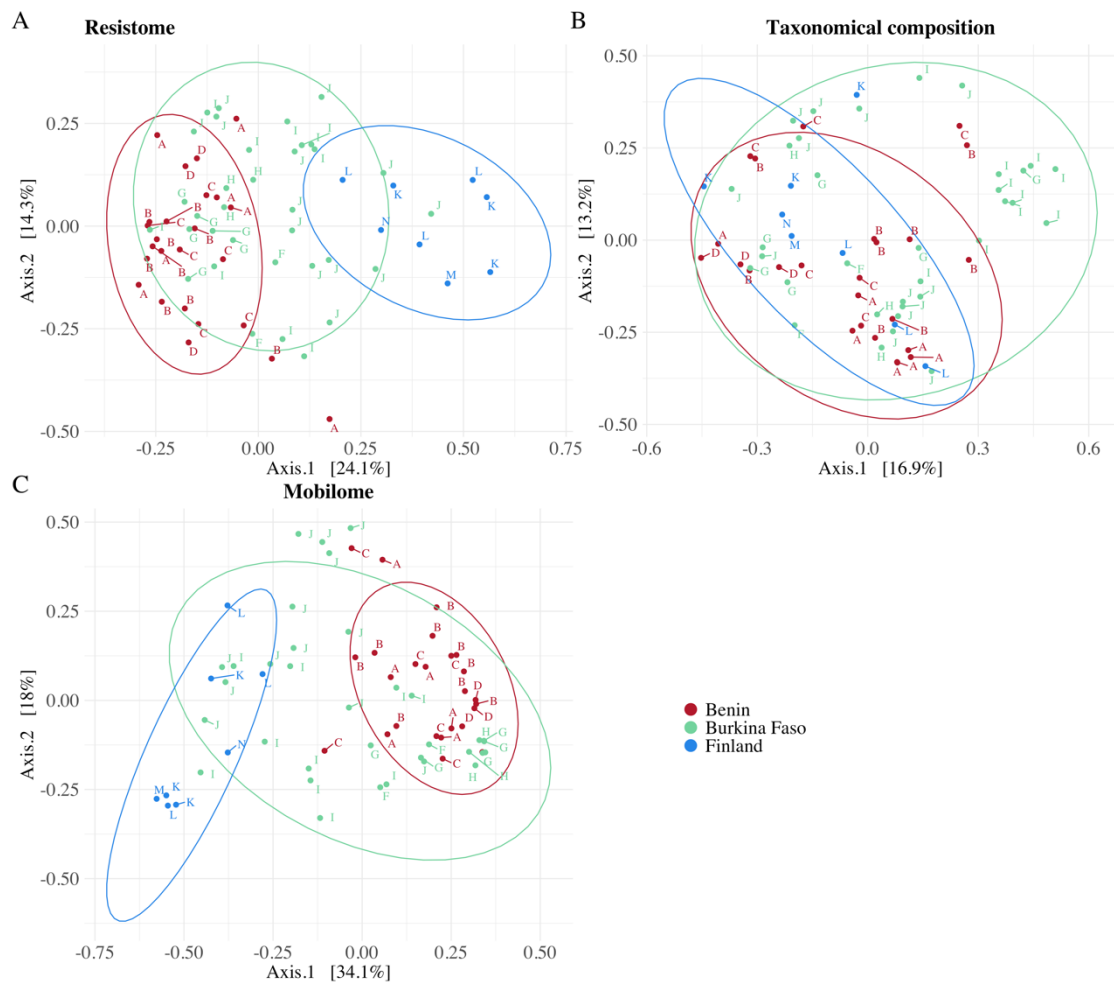

**Figure S3.** PCoA plots describe the ordinations based on A) resistomes, B) taxonomical compositions, and C) mobilomes in HWWs from Benin, Burkina Faso, and Finland. Countries are coded as colors, and the specific hospitals are marked with a corresponding capitalized letter. Confidence ellipses represent 90 % confidence levels.

**Table S1.** Significance levels for ordination plots. The significance was measured using the adonis test for equal-sized sample groups (n=8/country) of randomly selected samples. The triplicated tests were mainly in line with each other, suggesting that sample selection did not significantly affect the results. The significance levels are denoted as follows: ‘\*\*\*’  $\leq 0.001$ ; ‘\*\*’ = 0.001-0.01; ‘\*’ = 0.01-0.05; ‘.’ = 0.05-0.1; ‘ ’ = 0.1-1.

|                               |           |            | ARG, Horn     |           |            |               |           |            |     |
|-------------------------------|-----------|------------|---------------|-----------|------------|---------------|-----------|------------|-----|
| sample set #1                 |           |            | sample set #2 |           |            | sample set #3 |           |            |     |
| $R^2$                         | $p$ value | sig. level | $R^2$         | $p$ value | sig. level | $R^2$         | $p$ value | sig. level |     |
| Benin-Finland                 | 0.29492   | 0.001      | ***           | 0.30982   | 0.002      | **            | 0.33668   | 0.001      | *** |
| Benin-Burkina Faso            | 0.09321   | 0.121      |               | 0.17575   | 0.002      | **            | 0.16236   | 0.007      | **  |
| Burkina Faso-Finland          | 0.24544   | 0.001      | ***           | 0.25117   | 0.001      | ***           | 0.25582   | 0.001      | *** |
| Taxonomical composition, Horn |           |            |               |           |            |               |           |            |     |
| sample set #1                 |           |            | sample set #2 |           |            | sample set #3 |           |            |     |
| $R^2$                         | $p$ value | sig. level | $R^2$         | $p$ value | sig. level | $R^2$         | $p$ value | sig. level |     |
| Benin-Finland                 | 0.17282   | 0.002      | **            | 0.20603   | 0.001      | ***           | 0.18496   | 0.002      | **  |
| Benin-Burkina Faso            | 0.08476   | 0.159      |               | 0.14289   | 0.007      | **            | 0.08541   | 0.007      |     |
| Burkina Faso-Finland          | 0.16481   | 0.001      | ***           | 0.14788   | 0.006      | **            | 0.16983   | 0.002      | **  |
| MGEs, Horn                    |           |            |               |           |            |               |           |            |     |
| sample set #1                 |           |            | sample set #2 |           |            | sample set #3 |           |            |     |
| $R^2$                         | $p$ value | sig. level | $R^2$         | $p$ value | sig. level | $R^2$         | $p$ value | sig. level |     |
| Benin-Finland                 | 0.31312   | 0.002      | **            | 0.34187   | 0.001      | ***           | 0.34196   | 0.001      | *** |
| Benin-Burkina Faso            | 0.06114   | 0.497      |               | 0.10201   | 0.098      | .             | 0.0994    | 0.094      | .   |
| Burkina Faso-Finland          | 0.20934   | 0.001      | ***           | 0.22952   | 0.001      | ***           | 0.20678   | 0.002      | **  |

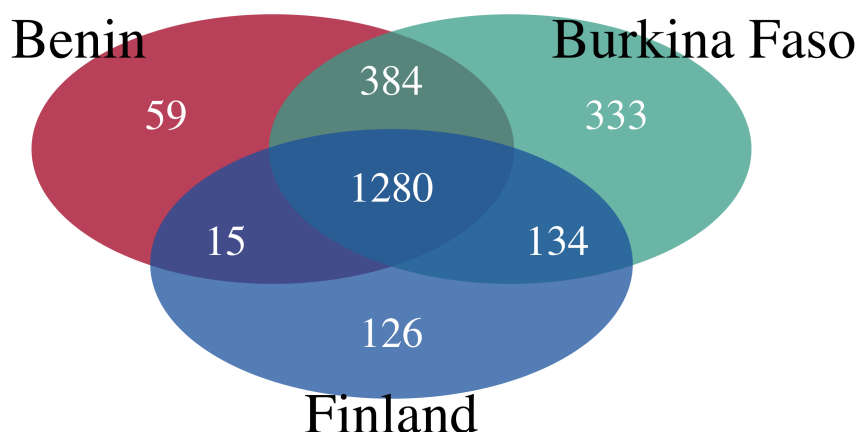

**Figure S4.** Unique and shared ARGs between hospital wastewaters in Benin, Burkina Faso, and Finland. A total of 2,331 ARGs were detected among 67 hospital wastewater samples in the three countries. The number of unique ARGs was substantially higher ( $n = 333$ ) in Burkina Faso compared to Benin ( $n = 59$ ) or Finland ( $n = 126$ ).

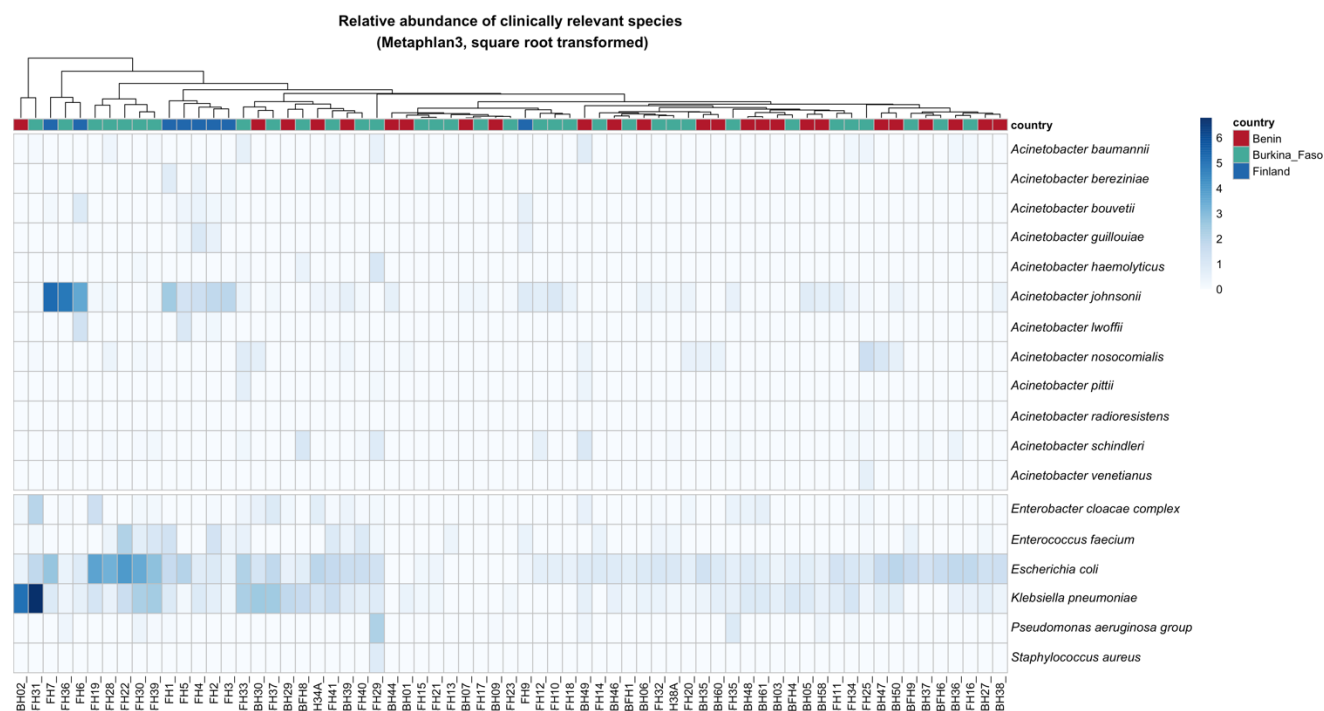

**Figure S5.** Relative abundance of clinically relevant species. The heatmap shows the relative abundances of species listed in the ESKAPEEc group (*Enterococcus faecium*, *Staphylococcus aureus*, *Klebsiella pneumoniae*, *Acinetobacter baumannii*, *Pseudomonas aeruginosa*, *Enterobacter* spp., and *Escherichia coli*) defined by de Angelis and colleagues (1). In addition, *Acinetobacter* species with known intrinsic resistance to carbapenems according to the Beta-lactamase Database (2) are shown. Of these, species with a total relative abundance higher than 0.05 in the samples are shown.

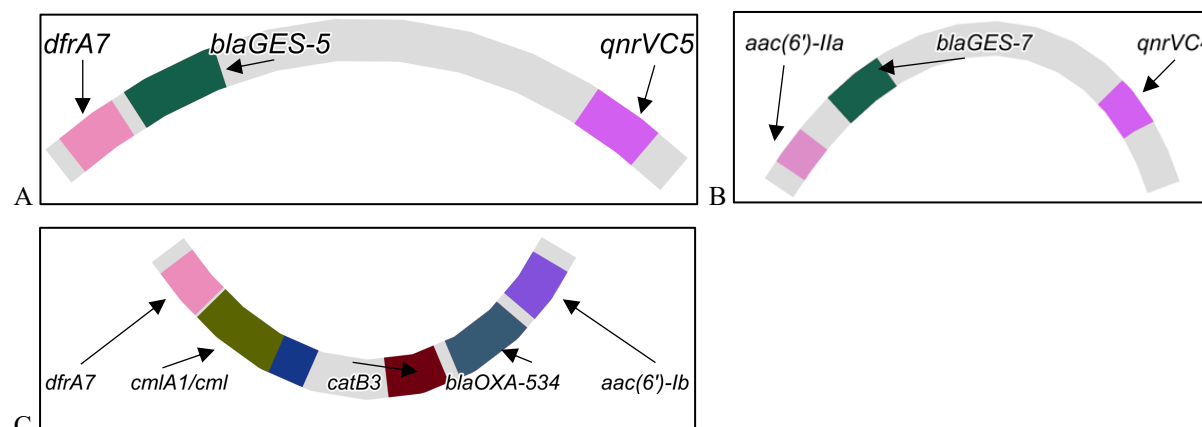

**Figure S6.** Examples of assembly graphs showing multidrug-resistance fragments putatively encoded by class 1 integron gene cassettes in samples A) BH02, B) BH48, and C) BFH19.



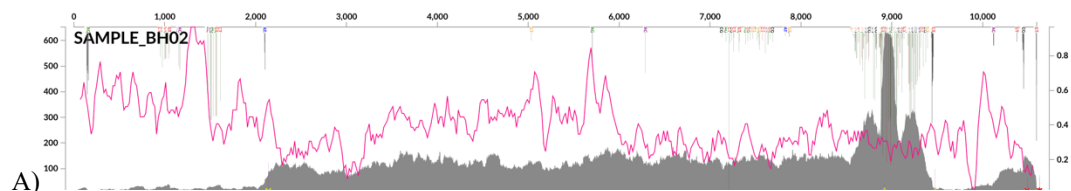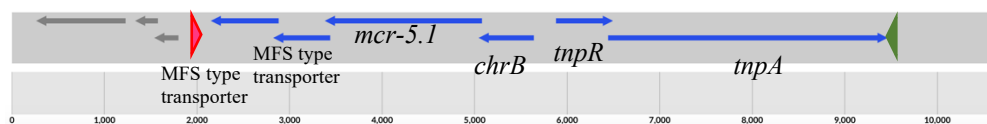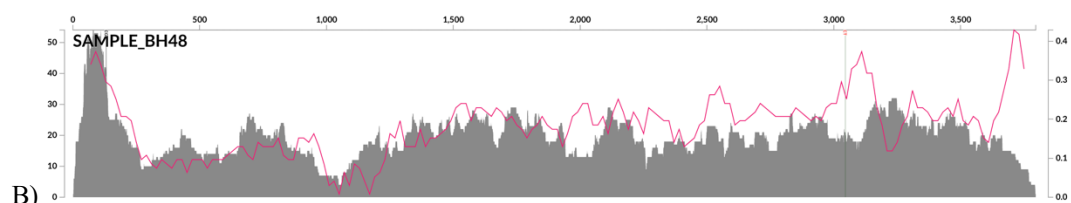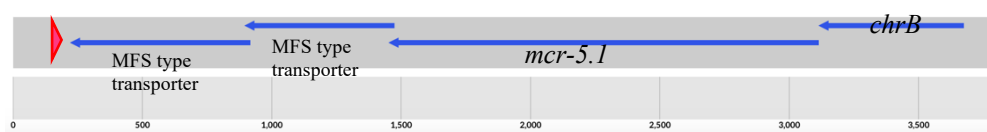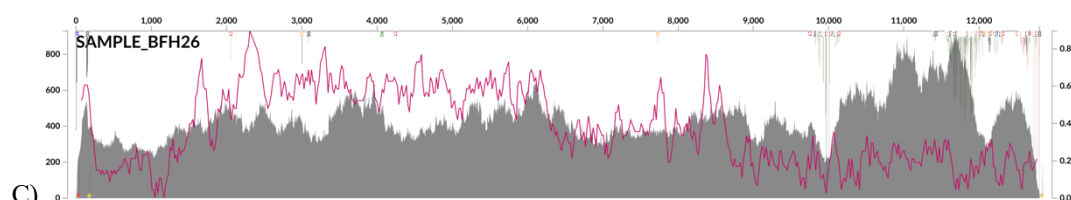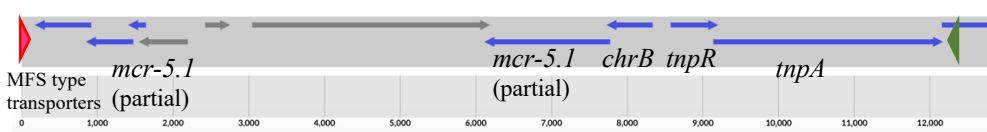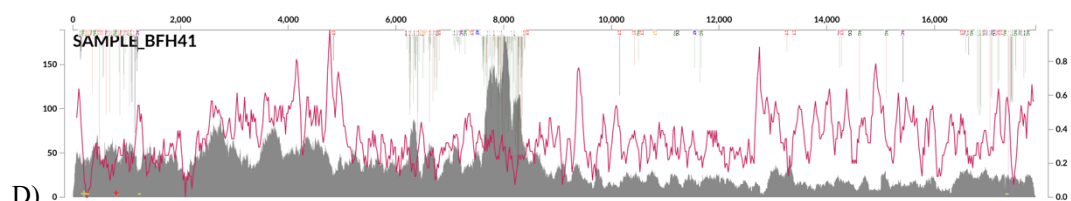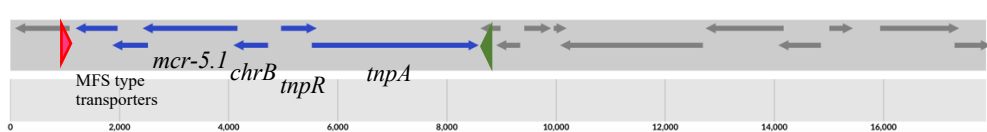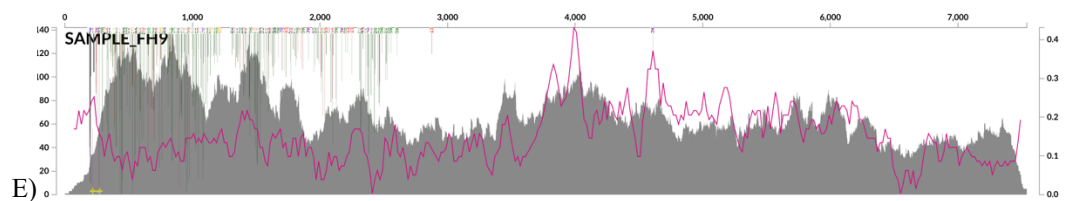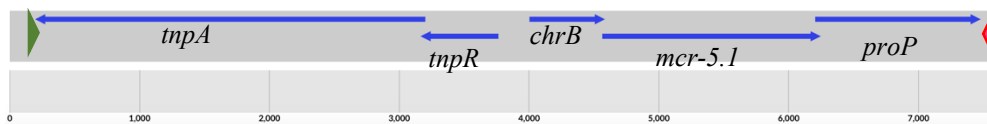

**Figure S7.** Comparative analysis of contigs that harbor mobile colistin resistance gene *mcr-5.1* in four different metagenomic samples. Visualizations of the contigs were created using anvi'o (v7) metagenomics workflow for single profiles (3). Blue arrows indicate putative encoding genes. The gene names were determined based on BLAST search results. The recruited reads are shown as a dark grey histogram with an overlay line (pink) denoting the GC content. Single nucleotide variation is shown on top of the panel with colorful vertical lines. Inverse repeat sequences of Tn3-like transposase sequences (38 bp) are shown with dark pink (IRL: 5' GGGGTCGTCTCAGAAAACGGAAAAATCGTACGCTAAG 3'(4)) and green triangles (IRR: 5' CTTAGCGTACGATTTTTTCCGTTTTCTAGACGACCCC 3' (4)). The genetic environments are shown for samples A) BH02 B) BH48, C) BFH26 D) BFH41, and E) FH9.

## References

1. de Angelis G, Fiori B, Menchinelli G, Tiziana D'inzeo &, Flora &, Liotti M, Morandotti GA, Sanguinetti M, Posteraro B, Spanu T. 2007. Incidence and antimicrobial resistance trends in bloodstream infections caused by ESKAPE and Escherichia coli at a large teaching hospital in Rome, a 9-year analysis (2007-2015). *European Journal of Clinical Microbiology & Infectious Diseases* 37:1627–1636.
2. Naas T, Oueslati S, Bonnin RA, Laura Dabos M, Zavala A, Dortet L, Retailleau P, Iorga BI, emy Bonnin RA. 2017. Beta-lactamase database (BLDB)-structure and function. *Journal of Enzyme Inhibition and Medicinal Chemistry* 32:917–919.
3. Murat Eren A, Kiefl E, Shaiber A, Veseli I, Miller SE, Schechter MS, Fink I, Pan JN, Yousef M, Fogarty EC, Trigodet F, Watson AR, Esen ÖC, Moore RM, Clayssen Q, Lee MD, Kivenson V, Graham ED, Merrill BD, Karkman A, Blankenberg D, Eppley JM, Sjödin A, Scott JJ, Vázquez-Campos X, McKay LJ, McDaniel EA, R Stevens SL, Anderson RE, Fuessel J, Fernandez-Guerra A, Maignien L, Delmont TO, Willis AD. 2021. Community-led, integrated, reproducible multi-omics with anvi'o. *Nature Microbiology* 6:3–6.
4. Borowiak M, Fischer J, Hammerl JA, Hendriksen RS, Szabo I, Malorny B. 2017. Identification of a novel transposon-associated phosphoethanolamine transferase gene, *mcr-5*, conferring colistin resistance in d-tartrate fermenting *Salmonella enterica* subsp. *enterica* serovar Paratyphi B. *Journal of Antimicrobial Chemotherapy* 72:3317–3324.
